# Supplementary material
Source: publisher site journal article supplement (https://www.dovepress.com/article/405072)
Supplement: Supplementary file 1 [file get_supplementary_file.php]

## List of tables

Table S1 shows the socio-demographic characteristics of the participants

| Variable                                       | Category                     | Frequency (n=313) | Percentage             |
|------------------------------------------------|------------------------------|-------------------|------------------------|
| Age (Years)                                    | 18-25 years                  | 110               | 35.6                   |
|                                                | 25 years and above           | 199               | 64.4                   |
| Mean, range, and std dev. of age in full years | [Mean=25 years]              | [Range =19-53]    | [Std. Dev= $\pm$ 3.10] |
| Gender                                         | Female                       | 102               | 32.6                   |
|                                                | Male                         | 211               | 67.4                   |
| Marital status                                 | Married                      | 24                | 7.7                    |
|                                                | Single                       | 275               | 87.9                   |
|                                                | Separated/Divorced           | 13                | 4.2                    |
|                                                | Widowed                      | 1                 | 0.3                    |
| Religion                                       | Christian                    | 285               | 91.0                   |
|                                                | Muslim                       | 23                | 7.4                    |
|                                                | Others                       | 5                 | 1.6                    |
| Level of education                             | No formal education/Informal | 13                | 4.1                    |
|                                                | Primary level                | 10                | 3.2                    |
|                                                | Secondary level              | 34                | 10.9                   |
|                                                | Post-secondary               | 256               | 81.8                   |
| Employment status                              | Unemployed – student         | 91                | 29.3                   |
|                                                | Unemployed – not a student   | 14                | 4.5                    |
|                                                | Informal                     | 134               | 43.1                   |
|                                                | Formal/contract/salary       | 74                | 23.1                   |
| Monthly income (estimated)                     | No income                    | 14                | 4.5                    |
|                                                | Less than 200,000            | 77                | 24.6                   |
|                                                | 200,000-500,000              | 177               | 56.5                   |
|                                                | More than 500,000            | 45                | 14.4                   |
| Availability of medical insurance              | Yes                          | 96                | 30.7                   |
|                                                | No                           | 217               | 69.3                   |
| Form of housing                                | Own apartment/housing        | 12                | 3.9                    |
|                                                | Renting/leased apartment     | 275               | 89.6                   |
|                                                | Other                        | 20                | 6.5                    |

Table S2 shows the bivariate analyses of individual, household, and health systems factors associated with antibiotic self-medication

| Internet-enabled antibiotic self-medication |                 |                |                    |              |
|---------------------------------------------|-----------------|----------------|--------------------|--------------|
| Variable                                    | Yes (n =246)(%) | No (n = 64)(%) | cOR (CI at 95%)    | P-value      |
| <b>Individual factors</b>                   |                 |                |                    |              |
| <b>Age (Years)</b>                          |                 |                |                    |              |
| Below 25 years 18-25                        | 71 (28.9%)      | 39 (61%)       | Ref                |              |
| 25 years and above                          | 175 (71.1%)     | 24(39%)        | 10.9 (0.9-29.3)    | 0.058        |
| <b>Gender</b>                               |                 |                |                    |              |
| Male                                        | 181(74.6%)      | 28 (43.8%)     | 3.8(2.0-6.3)       | <0.001       |
| Female                                      | 65(26.4%)       | 36 (56.2%)     | Ref                |              |
| <b>Marital status</b>                       |                 |                |                    |              |
| Married                                     | 11(4.5%)        | 13(20.3%)      | 0.73(0.2-2.8)      | 0.642        |
| Single                                      | 227(92.3%)      | 45(70.3%)      | 4.3 (1.387-13.470) | <b>0.012</b> |

|                                                                             |             |             |                   |                  |
|-----------------------------------------------------------------------------|-------------|-------------|-------------------|------------------|
| Separated                                                                   | 7(2.9%)     | 6 (9.4%)    | Ref               |                  |
| Widowed                                                                     | 1 (0.3)     | 0(0%)       | Omitted           |                  |
| <b>Level of education</b>                                                   |             |             |                   |                  |
| Post-secondary                                                              | 216(87.8%)  | 39(61.0%)   | 2.77(0.795-9.643) | 0.110            |
| Secondary                                                                   | 14(5.6%)    | 19(29.7%)   | 0.37(0.092-1.411) | 0.158            |
| Primary                                                                     | 8 (3.3%)    | 2 (3.1%)    | 2(0.281-14.198)   | 0.64             |
| No formal Education                                                         | 8(3.3%)     | 4(6.2%)     | Ref               |                  |
| <b>Monthly income (UGX)</b>                                                 |             |             |                   |                  |
| Less than 200,000                                                           | 51(21.0%)   | 25 (48.1%)  | 0.26(0.1-0.7)     | <b>0.010</b>     |
| 200,000-500,000                                                             | 153(62.7%)  | 22(42.4%)   | 0.87(0.3-2.4)     | 0.790            |
| More than 500,000                                                           | 40(16.3%)   | 5(9.5%)     | Ref               |                  |
| <b>Religion</b>                                                             |             |             |                   |                  |
| Christian                                                                   | 230(93.5%)  | 52 (81.2%)  | 4.4 (0.7-32.1)    | 0.142            |
| Muslim                                                                      | 14 (5.7%)   | 9(14.1%)    | 1.6 (0.2-13.1)    | 0.685            |
| Other                                                                       | 2 (0.8%)    | 3(4.7%)     | Ref               |                  |
| <b>Availability of Medical Insurance</b>                                    |             |             |                   |                  |
| No                                                                          | 160 (65.0%) | 55 (86.0%)  | 0.3(0.1-0.6)      | <b>0.002</b>     |
| Yes                                                                         | 86 (35.0%)  | 9(14.0%)    | Ref               |                  |
| <b>Form of employment</b>                                                   |             |             |                   |                  |
| Unemployed/nonstudent                                                       | 60 (24.5%)  | 30(47.6%)   | 0.4 (0.2-0.9)     | <b>0.020</b>     |
| Unemployed/student                                                          | 10 (4.1%)   | 4(6.3%)     | 0.5(0.1-0.9)      | 0.313            |
| Informal employment                                                         | 116(46.9%)  | 16(25.4.0%) | 1.5(0.7-3.3)      | 0.348            |
| Formal employment                                                           | 59 (24.5%)  | 12 (19.0%)  | Ref               |                  |
| Other                                                                       | 1 (0.4%)    | 1(1.7%)     | Omitted           |                  |
| <b>Knowledge of antibiotics</b>                                             |             |             |                   |                  |
| No                                                                          | 3(1.2%)     | 13 (20.6%)  | Ref               |                  |
| Yes                                                                         | 243(98.8%)  | 51(79.4%)   | 21.1(5.8-76.6)    | <b>&lt;0.001</b> |
| <b>Individual perception of internet-enabled antibiotic self-medication</b> |             |             |                   |                  |
| <b>Costly to go to the hospital</b>                                         |             |             |                   |                  |
| I agree                                                                     | 209 (85.0%) | 36 (56.3%)  | 3.0 (1.5-5.7)     | <b>0.001</b>     |
| I do not agree                                                              | 37(15.0%)   | 28 (43.7%)  | Ref               |                  |
| <b>Illness did not require to go to a hospital</b>                          |             |             |                   |                  |
| I agree                                                                     | 180 (73.2%) | 39 (61.0%)  | 1.1 (0.6 -2.1)    | 0.734            |
| I do not agree                                                              | 66 (26.8%)  | 28 (39.0%)  | Ref               |                  |
| <b>Someone with similar symptoms used the same medication</b>               |             |             |                   |                  |
| I agree                                                                     | 130 (52.9%) | 37 (57.8%)  | 0.6 (0.3-1.0)     | 0.54             |
| I do not agree                                                              | 116 (47.1%) | 27 (42.2%)  | Ref               |                  |
| <b>I cannot afford hospital charges</b>                                     |             |             |                   |                  |
| I agree                                                                     | 144 (58.5%) | 19 (29.7%)  | 2.7 (1.5-4.9)     | <b>0.002</b>     |
| I do not agree                                                              | 102 (41.5%) | 45 (70.3%)  |                   |                  |
| <b>No easy access to health worker</b>                                      |             |             |                   |                  |
| I agree                                                                     | 67 (27.2%)  | 17 (26.6%)  | 0.8(0.4- 1.6)     | 0.583            |
| I do not agree                                                              | 179 (72.8%) | 47 (73.4%)  | Ref               |                  |
| <b>Cost saving</b>                                                          |             |             |                   |                  |
| I agree                                                                     | 78 (31.7%)  | 36 (56.3%)  | 1.2 (0.6 -2.4)    | 0.599            |
| I do not agree                                                              | 168 (68.3%) | 28 (43.7%)  | Ref               |                  |
| <b>Online information is quick and easy to use</b>                          |             |             |                   |                  |
| I agree                                                                     | 113 (45.9%) | 38 (59.4%)  | 2.6(1.4-4.9)      | <b>0.002</b>     |
| Do not agree                                                                | 133 (54.1%) | 26 (40.6%)  | Ref               |                  |
| <b>Trusted online information without prescription</b>                      |             |             |                   |                  |

|                                                                                             |                       |                     |                        |                  |
|---------------------------------------------------------------------------------------------|-----------------------|---------------------|------------------------|------------------|
| I agree                                                                                     | 88 (35.8%)            | 24 (37.5%)          | 0.7(0.4-1.3)           | 0.277            |
| I do not agree                                                                              | 158 (64.2%)           | 40 (62.5%)          | <i>Ref</i>             |                  |
| <b><i>No side effects with Self-Medication from online information</i></b>                  |                       |                     |                        |                  |
| I agree                                                                                     | 86 (35.0%)            | 16 (25.0%)          | 1.3(0.7-2.4)           | 0.41             |
| I do not agree                                                                              | 160 (65.0%)           | 148 (75.0%)         | <i>Ref</i>             |                  |
| <b><i>Online information provides an antibiotic prescription</i></b>                        |                       |                     |                        |                  |
| I agree                                                                                     | 94 (38.2%)            | 21 (32.8%)          | 1.0(0.5-0.8)           | 0.997            |
| I do not agree                                                                              | 152 (61.8%)           | 43 (67.2%)          | <i>Ref</i>             |                  |
| <b><i>I have easy access to online 'google' information</i></b>                             |                       |                     |                        |                  |
| I agree                                                                                     | 170(69.1%)            | 35 (54.7%)          | 1.2(0.7-2.3)           | 0.540            |
| I do not agree                                                                              | 76 (30.9%)            | 29 (45.3%)          | <i>Ref</i>             |                  |
| <b><i>Perceptions about antibiotic self-medication using online information</i></b>         |                       |                     |                        |                  |
| Good practice                                                                               | 27(11%)               | 9 (14%)             | 5.2(1.9-13.9)          | <b>0.001</b>     |
| Acceptable practice                                                                         | 199(80.9%)            | 27(42.2%)           | 15.0(6.9-32.3)         | <b>&lt;0.001</b> |
| Not acceptable                                                                              | 20 (8.1%)             | 28 (43.8%)          | <i>Ref</i>             |                  |
| <b><i>Internet should be used for antibiotic self-medication</i></b>                        |                       |                     |                        |                  |
| No                                                                                          | 29(11.8%)             | 29(45.3%)           | <i>Ref</i>             |                  |
| Yes                                                                                         | 217(88.2%)            | 35(55.7%)           | 8.7(4.4-16.8)          | <b>&lt;0.001</b> |
| <b>Household factors</b>                                                                    |                       |                     |                        |                  |
| <b>Variable</b>                                                                             | <b>Yes (n=246)(%)</b> | <b>No (n=64)(%)</b> | <b>cOR (CI at 95%)</b> | <b>P value</b>   |
| <b><i>Number of people staying in the same house</i></b>                                    |                       |                     |                        |                  |
| Lived alone                                                                                 | 59(24.3%)             | 6(9.4%)             | 14.5(5.2-40.3)         | <b>&lt;0.001</b> |
| Two                                                                                         | 118(48.6%)            | 24(37.5%)           | 7.3(3.5-15.0)          | <b>&lt;0.001</b> |
| Three                                                                                       | 47(19.3%)             | 6(9.4%)             | 11.5(4.1-32.3)         | <b>&lt;0.001</b> |
| More than three                                                                             | 19(7.8%)              | 28(43.7%)           | <i>Ref</i>             |                  |
| <b><i>Location of residence</i></b>                                                         |                       |                     |                        |                  |
| Isolated neighborhood                                                                       | 16(6.6%)              | 11(17.2%)           | 0.3(0.1-0.7)           | <b>0.004</b>     |
| A rented place with shared facilities                                                       | 164(67.3%)            | 32(50%)             | <i>Ref</i>             |                  |
| Stay in a rented place with unshared facilities                                             | 64(26.1%)             | 19(32.8%)           | 0.7(0.3-1.2)           | 0.197            |
| <b><i>Distance to the nearest medical center/ Hospital from the household residence</i></b> |                       |                     |                        |                  |
| Less than 5 km                                                                              | 117(48%)              | 40(62.5%)           | 1.8(0.6-5.1)           | 0.305            |
| About 5 km                                                                                  | 117(48%)              | 18(28.1%)           | 3.9(1.3-12.0)          | <b>0.018</b>     |
| More than 5 km                                                                              | 10(4%)                | 6(9.4%)             | <i>Ref</i>             |                  |
| <b><i>Level of education of household head</i></b>                                          |                       |                     |                        |                  |
| Primary                                                                                     | 9(3.7%)               | 4(6.8%)             | <i>Ref</i>             |                  |
| Secondary                                                                                   | 29(11.9%)             | 18(28.1)            | 0.7(0.2-2.7)           | 0.619            |
| Post-Secondary                                                                              | 206(84.4%)            | 41 (65.1%)          | 2.2(0.7-7.6)           | 0.198            |
| <b><i>Household monthly income (UGX)</i></b>                                                |                       |                     |                        |                  |
| Less than 500,000                                                                           | 30(12.4%)             | 21(35%)             | 0.7(0.3-1.6)           | 0.384            |
| 500,000-1,000,000                                                                           | 180 (74.7%)           | 24(40%)             | 3.6(1.7-7.7)           | <b>0.001</b>     |
| More than 1,000,000                                                                         | 31(12.9%)             | 15(25%)             | <i>Ref</i>             |                  |
| <b><i>Common practice of antibiotic self-medication in household</i></b>                    |                       |                     |                        |                  |
| No                                                                                          | 13(5.4%)              | 33(54.1%)           | 0.05(0.02-0.1)         | <b>&lt;0.001</b> |
| Yes                                                                                         | 228(94.6)             | 28(45.9%)           | <i>Ref</i>             |                  |
| <b><i>Beliefs towards antibiotic self-treatment based on online health information</i></b>  |                       |                     |                        |                  |
| <b><i>One can recover from illness without a doctor's prescription</i></b>                  |                       |                     |                        |                  |
| I agree                                                                                     | 221(91.3%)            | 44(74.6%)           | 3.6(1.7-7.5)           | <b>0.001</b>     |
| Do not agree                                                                                | 21(8.7%)              | 15(25.4%)           | <i>Ref</i>             |                  |

|                                                                                                      |             |           |              |                  |
|------------------------------------------------------------------------------------------------------|-------------|-----------|--------------|------------------|
| <b>One can read online health information to get prescription</b>                                    |             |           |              |                  |
| I agree                                                                                              | 197 (81.1%) | 28(49.1%) | 4.4(2.4-8.2) | <b>&lt;0.001</b> |
| I do not agree                                                                                       | 46(18.9%)   | 29(50.9%) | Ref          |                  |
| <b>One can read online health information to heal without a prescription from a doctor</b>           |             |           |              |                  |
| I agree                                                                                              | 131(54.4%)  | 34(58.6%) | 0.8(0.5-1.5) | 0.558            |
| No Agree                                                                                             | 110 (45.6%) | 24(41.4%) | Ref          |                  |
| <b>One can self-medicate using online information before seeing a doctor</b>                         |             |           |              |                  |
| I agree                                                                                              | 95(39.4%)   | 25(43.1%) | 0.9(0.5-1.5) | 0.607            |
| No Agree                                                                                             | 146(60.6%)  | 33(56.9%) | Ref          |                  |
| <b>Can use online health information to self-medicate and only see a doctor with serious illness</b> |             |           |              |                  |
| I agree                                                                                              | 99(41.1%)   | 27(46.6%) | 0.8(0.5-1.4) | 0.449            |
| Not Agree                                                                                            | 142(58.9%)  | 31(53.4%) | Ref          |                  |
| <b>Self-Medication using online information can be used to treat family members</b>                  |             |           |              |                  |
| I agree                                                                                              | 100(41.5%)  | 27(45.8%) | 0.8(0.5-1.5) | 0.552            |
| I do not agree                                                                                       | 141(58.5%)  | 32(54.2%) | Ref          |                  |
| <b>Family members have medical insurance</b>                                                         |             |           |              |                  |
| Yes                                                                                                  | 27(12.2%)   | 9(14.8%)  | 1.4(0.7-3.1) | 0.446            |
| No                                                                                                   | 214(88.8%)  | 52 (85.2) | Ref          |                  |

**Health system factors**

| <b>Variable</b>                                                                                                              | <b>Yes (n=246) (%)</b> | <b>No (n=64)(%)</b> | <b>cOR (CI at 95%)</b> | <b>P value</b>   |
|------------------------------------------------------------------------------------------------------------------------------|------------------------|---------------------|------------------------|------------------|
| <b>Access to a medical center/Hospital/Pharmacy</b>                                                                          |                        |                     |                        |                  |
| Nearest to residence                                                                                                         | 83(34.4%)              | 24(39.3%)           | 3.3(0.2-57.4)          | 0.387            |
| Nearest to workplace                                                                                                         | 60(24.9%)              | 12(19.7%)           | 5(0.3-85.6)            | 0.267            |
| Nearest to both workplace & residence                                                                                        | 97(40.2%)              | 24(39.3%)           | 4.0(0.2-66.9)          | 0.330            |
| Other                                                                                                                        | 1(0.5%)                | 1(1.7%)             | Ref                    |                  |
| <b>Distance to the nearest medical center/ Hospital from your residence/workplace</b>                                        |                        |                     |                        |                  |
| Less than 5 km                                                                                                               | 119(49.6%)             | 46(74.2%)           | 2.6(0.6-10.8)          | 0.192            |
| About 5 km                                                                                                                   | 117(48.8%)             | 12(19.4%)           | 9.8(2.2-44.0)          | <b>0.003</b>     |
| More than 5 km                                                                                                               | 4(1.6%)                | 4(6.4%)             | Ref                    |                  |
| <b>Quality of services at the nearest medical center/ Hospital from your residence/workplace</b>                             |                        |                     |                        |                  |
| Poor quality                                                                                                                 | 52 (21.8%)             | 12(20.0%)           | 2.9(0.7-11.9)          | 0.141            |
| Good quality                                                                                                                 | 181(75.7%)             | 44(73.3%)           | 2.7(0.7-10.1)          | 0.130            |
| Other                                                                                                                        | 6(2.7%)                | 4(6.7%)             | Ref                    |                  |
| <b>The attitude of health workers at the nearest medical center/ Hospital from your residence/workplace</b>                  |                        |                     |                        |                  |
| Negative                                                                                                                     | 96 (40.5%)             | 14(23.0%)           | 10.3(1.6-67.1)         | <b>0.015</b>     |
| Positive                                                                                                                     | 139(58.6%)             | 44(72.1%)           | 4.7(0.8-29.3)          | 0.094            |
| Other                                                                                                                        | 2(0.9%)                | 3(6.7%)             | Ref                    |                  |
| <b>Drug shops/pharmacies near you give antibiotics without a prescription</b>                                                |                        |                     |                        |                  |
| No                                                                                                                           | 14(5.9%)               | 20(32.3%)           | 0.1(0.1-0.3)           | <b>&lt;0.001</b> |
| Yes                                                                                                                          | 224(94.1%)             | 42(67.7%)           | Ref                    |                  |
| <b>Medical workers at the nearest medical center/ Hospital explain adequately the antibiotics medication one is given</b>    |                        |                     |                        |                  |
| yes                                                                                                                          | 142(59.7%)             | 35(57.4%)           | 0.3(0.1-0.9)           | <b>0.028</b>     |
| No                                                                                                                           | 35(14.7%)              | 21(34.4%)           | 0.1(0.04-0.4)          |                  |
| I don't know                                                                                                                 | 61(25.6%)              | 5(8.2%)             | Ref                    |                  |
| <b>Medical workers use online health information only to diagnose your illness</b>                                           |                        |                     |                        |                  |
| Yes                                                                                                                          | 112 (47.1%)            | 12(19.4%)           | 3.3(1.6-6.8)           | <b>0.002</b>     |
| No                                                                                                                           | 46(19.3%)              | 22(35.5%)           | 0.7(0.4-1.4)           | 0.358            |
| I don't know                                                                                                                 | 80(33.6%)              | 28(45.1%)           | Ref                    |                  |
| <b>Ever change the dosage of antibiotics after a prescription by a medical worker secondary to online health information</b> |                        |                     |                        |                  |

|       |            |           |              |                  |
|-------|------------|-----------|--------------|------------------|
| Yes   | 152(65.2%) | 23(38.3%) | 3.1(1.7-5.6) | <b>&lt;0.001</b> |
| No    | 78(33.5%)  | 37(61.7%) | Ref          |                  |
| other | 3(1.3%)    | 0         | omitted      |                  |

*Variables whose p-values are indicated in bold are less than 0.05, and therefore showed a statistical association with the outcome variable.*

Table S3 shows multivariate analyses of individual, household, and health systems factors associated with antibiotic self-medication

| <b>Internet-enabled antibiotic self-medication</b>                                      |                        |                |                        |                |
|-----------------------------------------------------------------------------------------|------------------------|----------------|------------------------|----------------|
| <b>Variable</b>                                                                         | <b>cOR (CI at 95%)</b> | <b>P value</b> | <b>aOR (CI at 95%)</b> | <b>P value</b> |
| <b>Individual factors associated with Internet-enabled antibiotic self-medication</b>   |                        |                |                        |                |
| <i>Gender</i>                                                                           |                        |                |                        |                |
| Male                                                                                    | 3.6(2.0-6.3)           | <0.001         | 4.1(1.7-9.8)           | 0.001          |
| Female                                                                                  | Ref                    |                | Ref                    |                |
| <i>Marital status</i>                                                                   |                        |                |                        |                |
| Married                                                                                 | 0.7(0.2-2.8)           | 0.642          |                        |                |
| Single                                                                                  | 4.3(1.4-13.5)          | 0.012          | 12.6(3.8-41.8)         | <0.001         |
| Separated/divorced                                                                      | Ref                    |                | Ref                    |                |
| <i>Monthly income (UGX)?</i>                                                            |                        |                |                        |                |
| Less than 200,000                                                                       | 0.3(0.1-0.7)           | 0.010          | 0.7(0.2-0.9)           | 0.658          |
| 200,000-500,000                                                                         | 0.9(0.3-2.4)           | 0.790          | 1.4(0.1-20.6)          | 0.810          |
| More than 500,000                                                                       | Ref                    |                | Ref                    |                |
| <i>Availability of a medical insurance</i>                                              |                        |                |                        |                |
| No                                                                                      | 0.3(0.1-0.7)           | 0.002          | 1.33(0.4-4.8)          | 0.657          |
| Yes                                                                                     | 1.000                  |                | Ref                    |                |
| <i>Knowledge of antibiotics</i>                                                         |                        |                |                        |                |
| No                                                                                      | Ref                    |                | Ref                    |                |
| Yes                                                                                     | 21.1(5.8-76.6)         | <0.001         | 15.2(1.2-117.0)        | <b>0.009</b>   |
| <i>Form of employment</i>                                                               |                        |                |                        |                |
| Unemployed/nonstudent                                                                   | 0.4 (0.1-0.9)          | 0.020          | 0.5(0.3-8.7)           | 0.667          |
| Unemployed/student                                                                      | 0.51(0.1-0.9)          | 0.313          | 1.4(0.5-4.5)           | 0.533          |
| Informal employment                                                                     | 1.4(0.7-3.3)           | 0.348          | 4.6(0.6-33.2)          | 0.133          |
| Formal employment                                                                       | Ref                    |                | Ref                    |                |
| other                                                                                   | Omitted                |                |                        |                |
| <i>Individual perception of internet-enabled antibiotic self-medication</i>             |                        |                |                        |                |
| <i>Costly to go to the hospital</i>                                                     |                        |                |                        |                |
| I agree                                                                                 | 2.6(1.5-4.9)           | 0.002          | 0.5(0.2-1.2)           | 0.150          |
| Do not agree                                                                            | Ref                    |                |                        |                |
| <i>Using online information for antibiotic self-medication is quick and easy to use</i> |                        |                |                        |                |
| I agree                                                                                 | Ref                    |                | Ref                    |                |
| Do not agree                                                                            | 2.6 (1.4 – 4.9)        | 0.002          | 4.0 (1.5-11.1)         | <b>0.007</b>   |
| <i>Perception about using online information for antibiotic self-medication</i>         |                        |                |                        |                |
| Good practice                                                                           | 5.2(1.9-13.9)          | 0.001          | 3.7(1.3 -10.4)         | 0.15           |
| Acceptable practice                                                                     | 15(7.0-32.3)           | <0.001         | 11.3 (4.6-27.3)        | <0.001         |
| Not acceptable                                                                          | Ref                    |                | Ref                    |                |
| <i>Internet should be used for antibiotic self-medication</i>                           |                        |                |                        |                |
| No                                                                                      | Ref                    |                | Ref                    |                |
| Yes                                                                                     | 8.68(4.483-16.802)     | <0.001         | 3.60(1.087-11.940)     | <b>0.036</b>   |

| <b>Household factors associated with Internet-enabled antibiotic self-medication</b>                                                     |                    |        |                     |              |
|------------------------------------------------------------------------------------------------------------------------------------------|--------------------|--------|---------------------|--------------|
| <b><i>People staying in the same house</i></b>                                                                                           |                    |        |                     |              |
| I live alone                                                                                                                             | <i>Ref</i>         |        | <i>Ref</i>          |              |
| Two people                                                                                                                               | 0.2(0.2-1.3)       | 0.152  | 0.5(0.2-1.8)        | 0.309        |
| Three people                                                                                                                             | 0.8(0.2-2.6)       | 0.709  | 0.4(0.3-7.1)        | 0.699        |
| More than three                                                                                                                          | 0.1(0.02-0.2)      | <0.001 | 0.1(0.03-0.4)       | <b>0.001</b> |
| <b><i>Location of a residence</i></b>                                                                                                    |                    |        |                     |              |
| Isolated neighborhood                                                                                                                    | <i>Ref</i>         |        | <i>Ref</i>          |              |
| The rented place with shared facilities                                                                                                  | 3.523(1.496-8.293) | 0.004  | 3.21(0.729-14.148)  | 0.123        |
| Rented facilities with unshared facilities                                                                                               | 2.315(0.920-5.827) | 0.074  | 3.050(0.496-18.731) | 0.223        |
| <b><i>Household monthly income (UGX)</i></b>                                                                                             |                    |        |                     |              |
| Less than 500,000                                                                                                                        | <i>Ref</i>         |        | <i>Ref</i>          |              |
| 500,000-1,000,000                                                                                                                        | 5.3(2.6-10.6)      | <0.001 | 2.2(0.6-8.8)        | 0.250        |
| More than 1,000,000                                                                                                                      | 1.4(0.6-3.3)       | 0.384  | 1.7(0.3-8.0)        | 0.501        |
| <b><i>Common practice of antibiotic self-medication in a household</i></b>                                                               |                    |        |                     |              |
| No                                                                                                                                       | <i>Ref</i>         |        | <i>Ref</i>          |              |
| Yes                                                                                                                                      | 20.7(9.7-43.9)     | <0.001 | 7.1(2.1-24.7)       | <b>0.002</b> |
| <b><i>Household beliefs towards antibiotic self-medication based on online health information</i></b>                                    |                    |        |                     |              |
| <b><i>One can read information online and obtain a medical worker's prescription</i></b>                                                 |                    |        |                     |              |
| I agree                                                                                                                                  | <i>Ref</i>         |        | <i>Ref</i>          |              |
| Not Agree                                                                                                                                | 0.2(0.1-0.4)       | <0.001 | 0.8(0.3-2.0)        | 0.657        |
| <b><i>One can recover from the illness without a doctor's prescription</i></b>                                                           |                    |        |                     |              |
| I agree                                                                                                                                  | <i>Ref</i>         |        | <i>Ref</i>          |              |
| Do not agree                                                                                                                             | 0.3(0.1-0.6)       | 0.001  | 0.2(0.04-0.6)       | <b>0.004</b> |
| <b><i>Health system factors associated with Internet-enabled antibiotic self-medication</i></b>                                          |                    |        |                     |              |
| <b><i>Distance to the nearest medical center/ Hospital from your residence/workplace</i></b>                                             |                    |        |                     |              |
| Less than 5 km                                                                                                                           | <i>Ref</i>         |        |                     |              |
| About 5 km                                                                                                                               | 2.2(1.2-4.1)       | 0.011  | 4.6(1.5-14.5)       | <b>0.009</b> |
| More than 5 km                                                                                                                           | 0.6(0.2-1.7)       | 0.305  | 0.9(0.1-4.8)        | 0.964        |
| <b><i>The attitude of health workers at the nearest medical center/ Hospital from your residence/workplace</i></b>                       |                    |        |                     |              |
| Negative                                                                                                                                 | <i>Ref</i>         |        | <i>Ref</i>          |              |
| Positive                                                                                                                                 | 0.5(0.2-0.9)       | 0.020  | 0.8(0.3-2.1)        | 0.675        |
| Other                                                                                                                                    | 0.1(0.01-0.6)      | 0.015  | 0.1(0.01-1.6)       | 0.110        |
| <b><i>Drug shop/pharmacy nearer gives antibiotics without a prescription</i></b>                                                         |                    |        |                     |              |
| No                                                                                                                                       | <i>Ref</i>         |        | <i>Ref</i>          |              |
| Yes                                                                                                                                      | 7.6(3.6-16.3)      |        | 7.1 (1.8-28.1)      | <b>0.005</b> |
| <b><i>Medical workers at the nearest medical center/Hospital explain adequately the antibiotics medication given for the illness</i></b> |                    |        |                     |              |
| yes                                                                                                                                      | <i>Ref</i>         |        | <i>Ref</i>          |              |
| No                                                                                                                                       | 0.4(0.2-0.8)       | 0.008  | 0.3(0.09-0.8)       | <b>0.024</b> |
| I don't know                                                                                                                             | 3.0(1.1-8.0)       | 0.028  | 0.5(0.1-2.4)        | 0.381        |
| <b><i>Medical workers use online health information only to diagnose your illness</i></b>                                                |                    |        |                     |              |
| Yes                                                                                                                                      | <i>Ref</i>         |        | <i>Ref</i>          |              |
| No                                                                                                                                       | 0.2(0.1-0.5)       | <0.001 | 0.4(0.1-2.3)        | 0.431        |
| I don't know                                                                                                                             | 0.3(0.1-0.6)       | 0.002  | 2.1(0.5-8.8)        | 0.312        |
| <b><i>Ever changed the dosage of antibiotics after a prescription by a medical worker secondary to online health information</i></b>     |                    |        |                     |              |
| Yes                                                                                                                                      | <i>Ref</i>         |        | <i>Ref</i>          |              |
| No                                                                                                                                       | 0.3(0.2-0.6)       | <0.001 | 1.9(0.6-6.3)        | 0.291        |

Variables whose p-values are indicated in bold are less than 0.05, and therefore showed a statistical association with the outcome variable.

## APPENDIX I: QUESTIONNAIRE

| Section A: Socio-demographic questions                                                      |                                                                                                                                                                                                                                                                                                                                                 |
|---------------------------------------------------------------------------------------------|-------------------------------------------------------------------------------------------------------------------------------------------------------------------------------------------------------------------------------------------------------------------------------------------------------------------------------------------------|
| What is your place of residence? Village/cell/ward/LC1                                      |                                                                                                                                                                                                                                                                                                                                                 |
| What is your place of work/office/school or institution (if student)? Village/Cell/ward/LC1 |                                                                                                                                                                                                                                                                                                                                                 |
| What is your gender?                                                                        | Female <input type="checkbox"/> Male <input type="checkbox"/>                                                                                                                                                                                                                                                                                   |
| What is your age in years?                                                                  |                                                                                                                                                                                                                                                                                                                                                 |
| What is your religion?                                                                      | Christian <input type="checkbox"/> Muslim <input type="checkbox"/> Others (specify) .....                                                                                                                                                                                                                                                       |
| What is your marital status?                                                                | Married <input type="checkbox"/> Single <input type="checkbox"/><br>Separated/Divorced <input type="checkbox"/> Widowed <input type="checkbox"/>                                                                                                                                                                                                |
| What is your highest level of education?                                                    | No formal education/Informal <input type="checkbox"/> Primary level <input type="checkbox"/><br>Secondary level <input type="checkbox"/> Post-secondary <input type="checkbox"/>                                                                                                                                                                |
| What is your form of employment                                                             | Unemployed <input type="checkbox"/> Student <input type="checkbox"/> Informal <input type="checkbox"/><br>Formal/contract/salary <input type="checkbox"/> Other (specify) .....                                                                                                                                                                 |
| What is your monthly income (Ugandan Shillings)?                                            | Less than 200,000 <input type="checkbox"/> 200,000 – 500,000 <input type="checkbox"/><br>More than 500,000 <input type="checkbox"/>                                                                                                                                                                                                             |
| Do you have medical insurance?                                                              | Yes <input type="checkbox"/> No <input type="checkbox"/>                                                                                                                                                                                                                                                                                        |
| Which form of housing do you reside in?                                                     | Own apartment/housing <input type="checkbox"/> Renting/leased apartment <input type="checkbox"/>                                                                                                                                                                                                                                                |
| Section B: Determining the prevalence of Internet-enabled antibiotic self-medication        |                                                                                                                                                                                                                                                                                                                                                 |
| Do you know what antibiotics are?                                                           | Yes <input type="checkbox"/> No <input type="checkbox"/>                                                                                                                                                                                                                                                                                        |
| What are antibiotics used for? (check more than one if applicable)                          | Viral infection e.g. COVID-19 <input type="checkbox"/> Common cold <input type="checkbox"/><br>Bacterial infection e.g. Urinary Tract Infection <input type="checkbox"/><br>Upper Respiratory Tract Infection <input type="checkbox"/> Sepsis <input type="checkbox"/><br>Any infection <input type="checkbox"/> Others(specify) .....<br>..... |
| Are antibiotics good for the common cold?                                                   | Yes <input type="checkbox"/> No <input type="checkbox"/>                                                                                                                                                                                                                                                                                        |
| Have you had any illnesses in the last year?                                                | Yes <input type="checkbox"/> No <input type="checkbox"/>                                                                                                                                                                                                                                                                                        |
| Have you ever used online health information regarding any illness in the past year?        | Yes <input type="checkbox"/> No <input type="checkbox"/>                                                                                                                                                                                                                                                                                        |
| If yes in above, did that illness require you to use antibiotics?                           | Yes <input type="checkbox"/> No <input type="checkbox"/> I don't know <input type="checkbox"/>                                                                                                                                                                                                                                                  |
| If YES in the above, did you use any antibiotics?                                           | Yes <input type="checkbox"/> <input type="checkbox"/> No                                                                                                                                                                                                                                                                                        |
| If YES in the above, were the required antibiotics prescribed by the medical worker?        | Yes <input type="checkbox"/> No <input type="checkbox"/>                                                                                                                                                                                                                                                                                        |
| If No in above, how did you acquire the knowledge on self-treating with Antibiotics?        | Bought from a drug shop: Yes <input type="checkbox"/> No <input type="checkbox"/><br>Shared with a relative at home: Yes <input type="checkbox"/> No <input type="checkbox"/><br>Shared with a friend: Yes <input type="checkbox"/> No <input type="checkbox"/><br>Internet 'google' <input type="checkbox"/> Other specify.....                |
| Have you ever used online health information to self-treat with antibiotics?                | Yes <input type="checkbox"/> No <input type="checkbox"/>                                                                                                                                                                                                                                                                                        |



|                                                                                                                                                         |                                                                                                                                                                                                                                                                                                                                                                                                                                                                                                                                                                                                                                                                                                                                            |
|---------------------------------------------------------------------------------------------------------------------------------------------------------|--------------------------------------------------------------------------------------------------------------------------------------------------------------------------------------------------------------------------------------------------------------------------------------------------------------------------------------------------------------------------------------------------------------------------------------------------------------------------------------------------------------------------------------------------------------------------------------------------------------------------------------------------------------------------------------------------------------------------------------------|
| <p>Kindly rate the frequency of use on your source of information for antibiotics you used in the past 1 year.</p>                                      | <p>Health worker: Always <input type="checkbox"/> Sometimes <input type="checkbox"/> Never <input type="checkbox"/></p> <p>Internet/'google'/mobile applications/social media:<br/>Always <input type="checkbox"/> Sometimes <input type="checkbox"/> Never <input type="checkbox"/></p> <p>Family member: Always <input type="checkbox"/> Sometimes <input type="checkbox"/> Never <input type="checkbox"/></p> <p>Friend: Always <input type="checkbox"/> Sometimes <input type="checkbox"/> Never <input type="checkbox"/></p>                                                                                                                                                                                                          |
| <p>How many times have you self-medicated with antibiotics in the last year?</p>                                                                        | <p>Once <input type="checkbox"/> Two times <input type="checkbox"/> Three times <input type="checkbox"/><br/>More than three times <input type="checkbox"/> Never <input type="checkbox"/></p>                                                                                                                                                                                                                                                                                                                                                                                                                                                                                                                                             |
| <p>How many of those times have you self-medicated in the last year based on online health information only?</p>                                        | <p>Once <input type="checkbox"/> Two times <input type="checkbox"/> Three times <input type="checkbox"/><br/>More than three times <input type="checkbox"/> None <input type="checkbox"/></p>                                                                                                                                                                                                                                                                                                                                                                                                                                                                                                                                              |
| <p>What antibiotics do you commonly use while self-medication via the internet?</p>                                                                     | <p>Co-trimoxazole(Septrin): Yes <input type="checkbox"/> No <input type="checkbox"/></p> <p>Metronidazole (Flagyl): Yes <input type="checkbox"/> No <input type="checkbox"/></p> <p>Amoxicillin (Amoxyl): Yes <input type="checkbox"/> No <input type="checkbox"/></p> <p>Azithromycin: Yes <input type="checkbox"/> No <input type="checkbox"/></p> <p>Amoxiclav or Bactoclav (Amoxicillin and clavulanic acid): Yes <input type="checkbox"/> No <input type="checkbox"/> Others (specify) .....</p>                                                                                                                                                                                                                                      |
| <p>What type of health information were you able to obtain about the Antibiotic from the internet?</p>                                                  | <p>Type of antibiotic to take: Yes <input type="checkbox"/> No <input type="checkbox"/></p> <p>How many times to take the antibiotic: Yes <input type="checkbox"/> No <input type="checkbox"/></p> <p>How long to take the antibiotic: Yes <input type="checkbox"/> No <input type="checkbox"/></p> <p>Side effects of the antibiotic: Yes <input type="checkbox"/> No <input type="checkbox"/></p> <p>Antibiotic interactions or effects with other medicines:<br/>Yes <input type="checkbox"/> No <input type="checkbox"/></p> <p>What not to eat/drink while taking antibiotics: Yes <input type="checkbox"/> No <input type="checkbox"/> Others (specify) .....</p>                                                                    |
| <p><b>Section C: Assessing the individual factors precipitating Internet-enabled antibiotic self-medication</b></p>                                     |                                                                                                                                                                                                                                                                                                                                                                                                                                                                                                                                                                                                                                                                                                                                            |
| <p>What prompted you to self-medicate with Antibiotics using online health information? (Individual perception on internet-enabled self-medication)</p> | <p>Costly to go to a hospital: I agree <input type="checkbox"/> Not agree <input type="checkbox"/></p> <p>My illness did not require me to go to a hospital: I agree <input type="checkbox"/> Not agree <input type="checkbox"/></p> <p>Someone with similar symptoms used the same medication: I agree <input type="checkbox"/> Not agree <input type="checkbox"/></p> <p>I cannot afford the hospital charges: I agree <input type="checkbox"/> Not agree <input type="checkbox"/></p> <p>No access to Health Worker: I agree <input type="checkbox"/> Not agree <input type="checkbox"/></p> <p>Self-Medication using online health information is cost-saving: I agree <input type="checkbox"/> Not agree <input type="checkbox"/></p> |

|                                                                                                                                                                   |                                                                                                                                                                                                                                                                                                                                                                                                                                                                                                                                                                                                                                                                                                                                                                                                                                                                                                                                                                                                                                                                                                                                                 |
|-------------------------------------------------------------------------------------------------------------------------------------------------------------------|-------------------------------------------------------------------------------------------------------------------------------------------------------------------------------------------------------------------------------------------------------------------------------------------------------------------------------------------------------------------------------------------------------------------------------------------------------------------------------------------------------------------------------------------------------------------------------------------------------------------------------------------------------------------------------------------------------------------------------------------------------------------------------------------------------------------------------------------------------------------------------------------------------------------------------------------------------------------------------------------------------------------------------------------------------------------------------------------------------------------------------------------------|
|                                                                                                                                                                   | <p>I do not trust prescriptions from the medical workers:<br/> I agree <input type="checkbox"/> Not agree <input type="checkbox"/></p> <p>Self-medication using online health information is quick and easily used: I agree <input type="checkbox"/> Not agree <input type="checkbox"/></p> <p>Online health information is trustworthy to self-medicate without a prescription: I agree <input type="checkbox"/> Not agree <input type="checkbox"/></p> <p>Self-Medication from the internet as a source has no bad effects: I agree <input type="checkbox"/> Not agree <input type="checkbox"/></p> <p>Online health information provides a prescription and dosage for an illness: I agree <input type="checkbox"/> Not agree <input type="checkbox"/></p> <p>I have easy access to google information:<br/> I agree <input type="checkbox"/> Not agree <input type="checkbox"/></p> <p>Non-friendly health workers: I agree <input type="checkbox"/> Not agree <input type="checkbox"/></p> <p>Long waiting lines at health facilities:<br/> I agree <input type="checkbox"/> Not agree <input type="checkbox"/> Others (specify) .....</p> |
| <p>For which of the following complaint(s) do you use Antibiotics based on online health information only?</p>                                                    | <p>Runny nose: Yes <input type="checkbox"/> No <input type="checkbox"/></p> <p>Nasal congestion: Yes <input type="checkbox"/> No <input type="checkbox"/></p> <p>Cough: Yes <input type="checkbox"/> No <input type="checkbox"/></p> <p>Sore throat: Yes <input type="checkbox"/> No <input type="checkbox"/></p> <p>Fever: Yes <input type="checkbox"/> No <input type="checkbox"/></p> <p>Aches and pains: Yes <input type="checkbox"/> No <input type="checkbox"/></p> <p>Vomiting: Yes <input type="checkbox"/> No <input type="checkbox"/></p> <p>Pain while passing urine: Yes <input type="checkbox"/> No <input type="checkbox"/></p> <p>Diarrhea: Yes <input type="checkbox"/> No <input type="checkbox"/></p> <p>Skin wounds: Yes <input type="checkbox"/> No <input type="checkbox"/></p> <p>Ear/Eye illness: Yes <input type="checkbox"/> No <input type="checkbox"/></p> <p>Others (specify) .....</p>                                                                                                                                                                                                                             |
| <p>How long do you commonly take antibiotics used for self-medication based on online health information only?</p>                                                | <p>1-3 days <input type="checkbox"/> 4-7days <input type="checkbox"/> &gt;7 days <input type="checkbox"/></p>                                                                                                                                                                                                                                                                                                                                                                                                                                                                                                                                                                                                                                                                                                                                                                                                                                                                                                                                                                                                                                   |
| <p>Did you ever change the dosage of Antibiotics deliberately during self-treatment?</p>                                                                          | <p>Yes, always <input type="checkbox"/> Yes, sometimes <input type="checkbox"/></p>                                                                                                                                                                                                                                                                                                                                                                                                                                                                                                                                                                                                                                                                                                                                                                                                                                                                                                                                                                                                                                                             |
| <p>If yes in above, did health information online prompt you to change?</p>                                                                                       | <p>Yes <input type="checkbox"/> No <input type="checkbox"/> Sometimes <input type="checkbox"/></p>                                                                                                                                                                                                                                                                                                                                                                                                                                                                                                                                                                                                                                                                                                                                                                                                                                                                                                                                                                                                                                              |
| <p>If Yes above, why did you change the dosage of antibiotics during self-treatment (based on online health information)? (check more than one if applicable)</p> | <p>Improving conditions <input type="checkbox"/> Worsening conditions <input type="checkbox"/></p> <p>To reduce adverse reactions/side effects <input type="checkbox"/></p> <p>Drug insufficient for complete treatment <input type="checkbox"/></p> <p>Others (specify) .....</p>                                                                                                                                                                                                                                                                                                                                                                                                                                                                                                                                                                                                                                                                                                                                                                                                                                                              |

|                                                                                                                                         |                                                                                                                                                                                                                                                                                                                                                                                                  |
|-----------------------------------------------------------------------------------------------------------------------------------------|--------------------------------------------------------------------------------------------------------------------------------------------------------------------------------------------------------------------------------------------------------------------------------------------------------------------------------------------------------------------------------------------------|
|                                                                                                                                         |                                                                                                                                                                                                                                                                                                                                                                                                  |
| Please write down the names of antibiotics you have ever taken for self-medication based on online health information only:             | .....<br>.....<br>.....                                                                                                                                                                                                                                                                                                                                                                          |
| When did you normally stop taking antibiotics self-prescribed from the internet in the past 1 year? (check more than one if applicable) | After a few days regardless of the outcome <input type="checkbox"/><br>After symptoms disappeared <input type="checkbox"/><br>A few days after the recovery <input type="checkbox"/><br>After Antibiotics ran out <input type="checkbox"/><br>After the course/dose <input type="checkbox"/><br>After consulting a doctor/pharmacist <input type="checkbox"/><br>Others (specify) .....<br>..... |
| What do you think about self-medication with antibiotics based on online health information for self-health care?                       | Good practice <input type="checkbox"/> Acceptable practice <input type="checkbox"/><br>Not acceptable practice <input type="checkbox"/>                                                                                                                                                                                                                                                          |
| Internet should be used for self-medication with antibiotics                                                                            | Yes <input type="checkbox"/> No <input type="checkbox"/>                                                                                                                                                                                                                                                                                                                                         |
| What was your reason for using the internet for self-medication (check more than one if applicable)                                     | Ease of access <input type="checkbox"/> Trust the source of information <input type="checkbox"/><br>Avoid consultation fees <input type="checkbox"/> H/W attitude <input type="checkbox"/><br>'It is/was not a serious condition <input type="checkbox"/><br>Others (specify) .....<br>.....                                                                                                     |
| <b>Section D: Establishing the household factors related to Internet-enabled antibiotic self-medication</b>                             |                                                                                                                                                                                                                                                                                                                                                                                                  |
| How many people stay in the same house?                                                                                                 | I live alone <input type="checkbox"/> Two <input type="checkbox"/> Three <input type="checkbox"/> >Three <input type="checkbox"/>                                                                                                                                                                                                                                                                |
| How do you describe the location of your residence?                                                                                     | Live in an isolated neighborhood <input type="checkbox"/><br>Stay in a rented place with shared facilities <input type="checkbox"/><br>Stay in a rented place with unshared facilities <input type="checkbox"/>                                                                                                                                                                                  |
| What is the distance to the nearest medical center/ Hospital from your household residence?                                             | Less than 5kilometres <input type="checkbox"/> About 5 kilometers <input type="checkbox"/><br>More than 5 kilometers <input type="checkbox"/>                                                                                                                                                                                                                                                    |
| What is the highest level of education of the household head?                                                                           | No formal education/Informal <input type="checkbox"/> Primary level <input type="checkbox"/><br>Secondary level <input type="checkbox"/> Post-secondary level <input type="checkbox"/>                                                                                                                                                                                                           |
| What is the monthly income of the household?                                                                                            | Less than 500,000 <input type="checkbox"/> 500,000 – 1 million <input type="checkbox"/><br>Above 1 million <input type="checkbox"/>                                                                                                                                                                                                                                                              |
| Is antibiotic self-medication practiced in your household with other members?                                                           | Yes <input type="checkbox"/> No <input type="checkbox"/>                                                                                                                                                                                                                                                                                                                                         |
| What is the source of information for antibiotic self-medication in your household with other members?                                  | Health worker: Yes <input type="checkbox"/> No <input type="checkbox"/><br>Internet /google/mobile application: Yes <input type="checkbox"/> No <input type="checkbox"/><br>Family member: Yes <input type="checkbox"/> No <input type="checkbox"/><br>Friend: Yes <input type="checkbox"/> No <input type="checkbox"/>                                                                          |

|                                                                                                                               |                                                                                                                                                                                                                                                                                                                                                                                                                                                                                                                                                                                                                                                                                                                                                                                                                                                                                                                                                                                      |
|-------------------------------------------------------------------------------------------------------------------------------|--------------------------------------------------------------------------------------------------------------------------------------------------------------------------------------------------------------------------------------------------------------------------------------------------------------------------------------------------------------------------------------------------------------------------------------------------------------------------------------------------------------------------------------------------------------------------------------------------------------------------------------------------------------------------------------------------------------------------------------------------------------------------------------------------------------------------------------------------------------------------------------------------------------------------------------------------------------------------------------|
|                                                                                                                               | Household head: Yes <input type="checkbox"/> No <input type="checkbox"/> Others (specify) .....                                                                                                                                                                                                                                                                                                                                                                                                                                                                                                                                                                                                                                                                                                                                                                                                                                                                                      |
| What are your household beliefs towards self-treatment with antibiotics based on online health information?                   | One can recover from an illness without getting a doctor's prescription: I agree <input type="checkbox"/> Not agree <input type="checkbox"/><br>One can read health information online to get a prescription: I agree <input type="checkbox"/> Not agree <input type="checkbox"/><br>One can read health information online without getting a prescription from a certified doctor: I agree <input type="checkbox"/> Not agree <input type="checkbox"/><br>One can first self-treat via the internet before a visit to a doctor for any illness: I agree <input type="checkbox"/> Not agree <input type="checkbox"/><br>One can self-medicate via the internet and only visit a doctor for only a serious illness: I agree <input type="checkbox"/> Not agree <input type="checkbox"/><br>When one obtains antibiotics from the internet, they can be used to treat other family members: I agree <input type="checkbox"/> Not agree <input type="checkbox"/> Others (specify) ..... |
| Do family members have medical insurance?                                                                                     | Yes <input type="checkbox"/> No <input type="checkbox"/>                                                                                                                                                                                                                                                                                                                                                                                                                                                                                                                                                                                                                                                                                                                                                                                                                                                                                                                             |
| <b>Section E: Determining the health system factors related to Internet-enabled antibiotic self-medication</b>                |                                                                                                                                                                                                                                                                                                                                                                                                                                                                                                                                                                                                                                                                                                                                                                                                                                                                                                                                                                                      |
| Where is it commonly easier to access a medical center/Hospital/pharmacy?                                                     | Nearest to my residence <input type="checkbox"/><br>Nearest to my workplace <input type="checkbox"/> Both <input type="checkbox"/> Others .....                                                                                                                                                                                                                                                                                                                                                                                                                                                                                                                                                                                                                                                                                                                                                                                                                                      |
| What is the nearest medical center/Hospital to your residence/workplace?                                                      | Less than 5kilometres <input type="checkbox"/> About 5 kilometers <input type="checkbox"/><br>More than 5 kilometers <input type="checkbox"/>                                                                                                                                                                                                                                                                                                                                                                                                                                                                                                                                                                                                                                                                                                                                                                                                                                        |
| What do you think about the access to the nearest medical center/Hospital from your residence/workplace?                      | It's near <input type="checkbox"/> Far away <input type="checkbox"/> Very far away <input type="checkbox"/>                                                                                                                                                                                                                                                                                                                                                                                                                                                                                                                                                                                                                                                                                                                                                                                                                                                                          |
| What do you think about the services at the nearest medical center/Hospital from your residence/workplace?                    | Poor quality services <input type="checkbox"/> Good quality services <input type="checkbox"/><br>Others (specify) .....                                                                                                                                                                                                                                                                                                                                                                                                                                                                                                                                                                                                                                                                                                                                                                                                                                                              |
| What do you think about the attitude of health workers at the nearest medical center/ Hospital from your residence/workplace? | Negative attitude <input type="checkbox"/> Positive attitude <input type="checkbox"/>                                                                                                                                                                                                                                                                                                                                                                                                                                                                                                                                                                                                                                                                                                                                                                                                                                                                                                |
| Does your nearest drug shop/pharmacy dispense Antibiotics without a doctor's prescription?                                    | Yes <input type="checkbox"/> No <input type="checkbox"/>                                                                                                                                                                                                                                                                                                                                                                                                                                                                                                                                                                                                                                                                                                                                                                                                                                                                                                                             |
| What do you think of the prices of the antibiotics at the nearest medical center/ Hospital?                                   | Affordable <input type="checkbox"/> Not affordable <input type="checkbox"/>                                                                                                                                                                                                                                                                                                                                                                                                                                                                                                                                                                                                                                                                                                                                                                                                                                                                                                          |
| Do you think the medical workers at your nearest medical center/Hospital/medical center are knowledgeable about your illness? | Yes <input type="checkbox"/> No <input type="checkbox"/> Sometimes <input type="checkbox"/> I don't know <input type="checkbox"/>                                                                                                                                                                                                                                                                                                                                                                                                                                                                                                                                                                                                                                                                                                                                                                                                                                                    |

|                                                                                                                                                       |                                                                                                                                                                                                                                                                                                                                                                                                                                                                |
|-------------------------------------------------------------------------------------------------------------------------------------------------------|----------------------------------------------------------------------------------------------------------------------------------------------------------------------------------------------------------------------------------------------------------------------------------------------------------------------------------------------------------------------------------------------------------------------------------------------------------------|
| Do the medical workers at your nearest medical center/Hospital explain adequately the medication you are given for your illness?                      | Yes <input type="checkbox"/> No <input type="checkbox"/> I don't know <input type="checkbox"/>                                                                                                                                                                                                                                                                                                                                                                 |
| Does the health worker encourage you to search online for health information on your illness?                                                         | Yes <input type="checkbox"/> No <input type="checkbox"/>                                                                                                                                                                                                                                                                                                                                                                                                       |
| Do you think that medical workers use online health information only to diagnose your illness?                                                        | Yes <input type="checkbox"/> No <input type="checkbox"/> I don't know <input type="checkbox"/>                                                                                                                                                                                                                                                                                                                                                                 |
| If yes, does this lead you to search online health information to self-medicate with Antibiotics without a prescription from the doctor?              | Yes, always <input type="checkbox"/> Yes, sometimes <input type="checkbox"/> No <input type="checkbox"/>                                                                                                                                                                                                                                                                                                                                                       |
| Did you ever change the dosage of Antibiotics after a prescription by a medical worker secondary to online health information?                        | Yes <input type="checkbox"/> No <input type="checkbox"/> Others (specify) .....                                                                                                                                                                                                                                                                                                                                                                                |
| What was the other source(s) of information that prompted you to change antibiotics/dosage of antibiotics after prescription by a medical worker?     | Internet/'google': Yes <input type="checkbox"/> No <input type="checkbox"/><br>Family member: Yes <input type="checkbox"/> No <input type="checkbox"/><br>Friend: Yes <input type="checkbox"/> No <input type="checkbox"/> Others (specify) .....                                                                                                                                                                                                              |
| What are some of the factors that discourage you from visiting a doctor at your nearest hospital/medical centre? (Choose more than one if applicable) | Consultancy fee <input type="checkbox"/><br>Costs related to diagnosis/tests/investigations <input type="checkbox"/><br>Availability of health workers <input type="checkbox"/><br>Quality of care given <input type="checkbox"/><br>Available antibiotics for self-treating at the drug shop without a prescription from a doctor <input type="checkbox"/><br>Available information on the internet for self-diagnosis and treatment <input type="checkbox"/> |
